# Supplementary material
Source: PubMed Central journal article supplement (PMC7610641)
Supplement: EMS118449-supplement-Supplementary_Figures.pdf [file EMS118449-supplement-Supplementary_Figures.pdf]

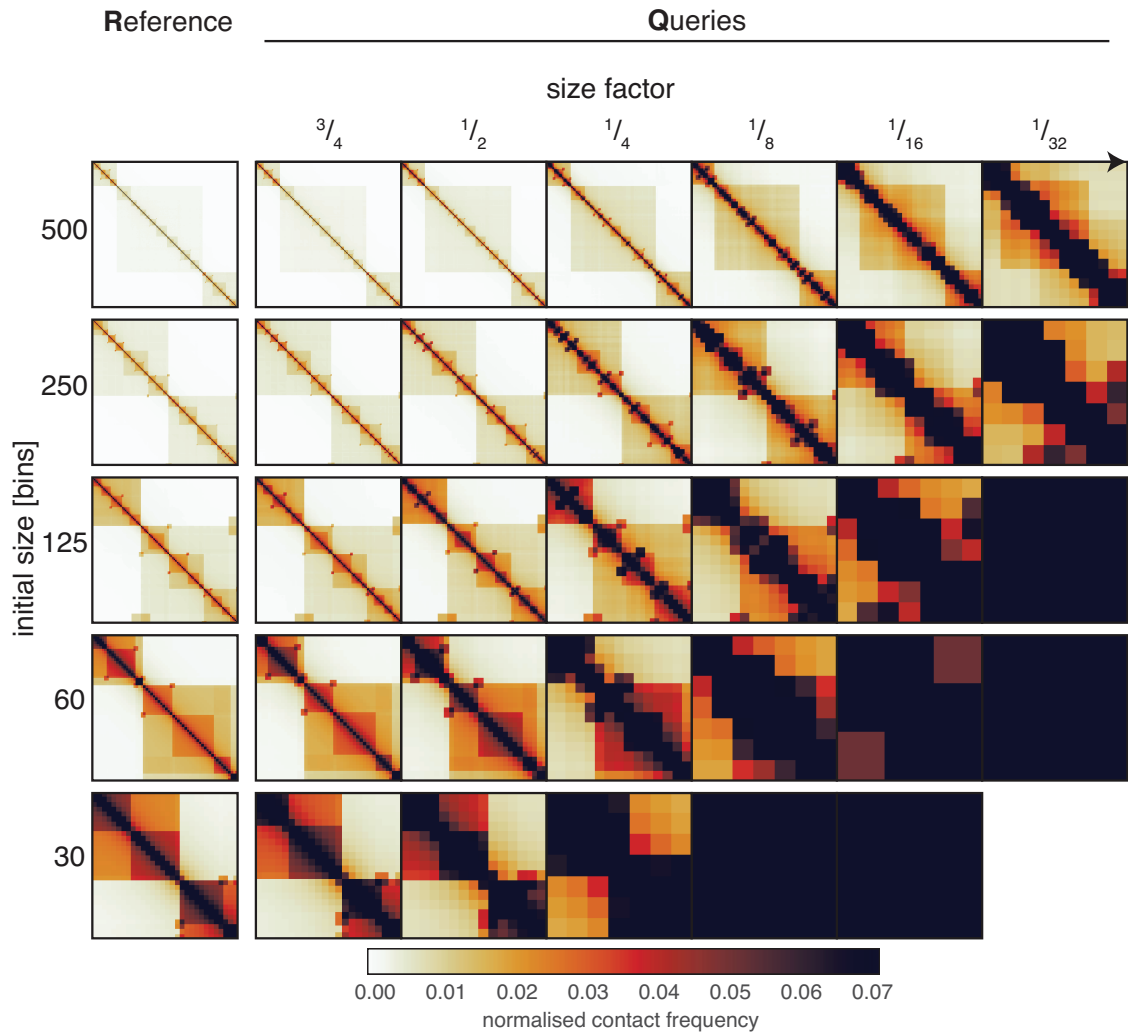

**Supplementary Figure 1. Examples of synthetic matrices scaled to different sizes.**

Matrix bins were rounded up to the nearest integer after scaling. Only matrices with at least two bins were plotted.

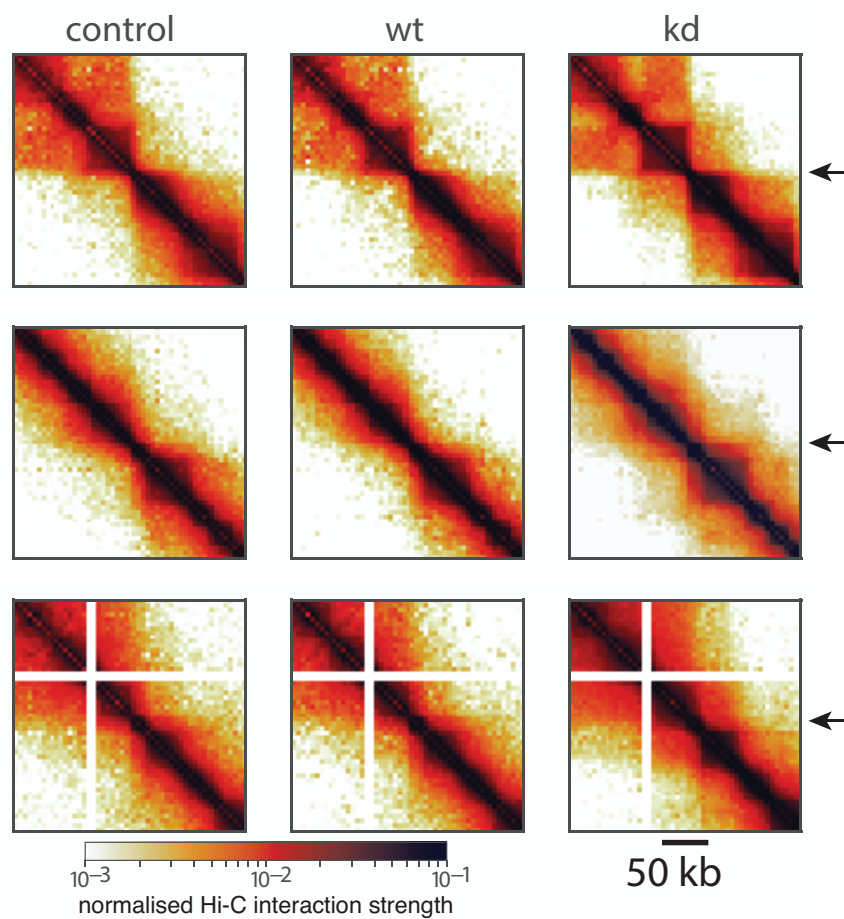

**Supplementary Figure 2. Examples of minor changes in boundary strength after *zld* knockdown in *D. melanogaster*.** Hi-C matrices are shown for a water injected control, wild type (wt) cells and cells after *zld* knockdown (kd). Arrows indicate positions of differential boundaries between wt and kd as identified previously<sup>9</sup>. White lines correspond to regions of the genome masked from the analysis due to low mappability.

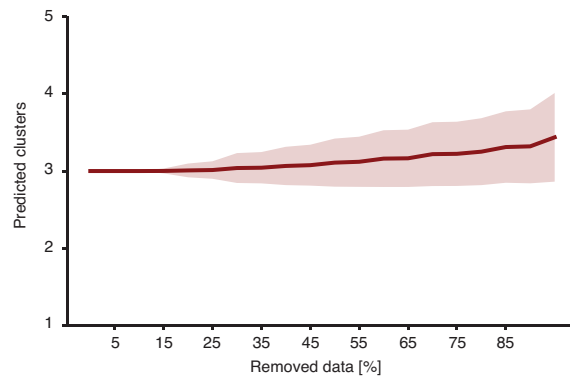

**Supplementary Figure 3. Effect of downsampling on number of optimal clusters.**

The optimal number of clusters was computed after downsampling all extracted features from the Hi-C data generated from healthy B-cells (control) and a diffuse large B-cell lymphoma (patient). This process was repeated 1,000 times. The solid line indicates the mean, shaded area corresponds to the standard deviation.

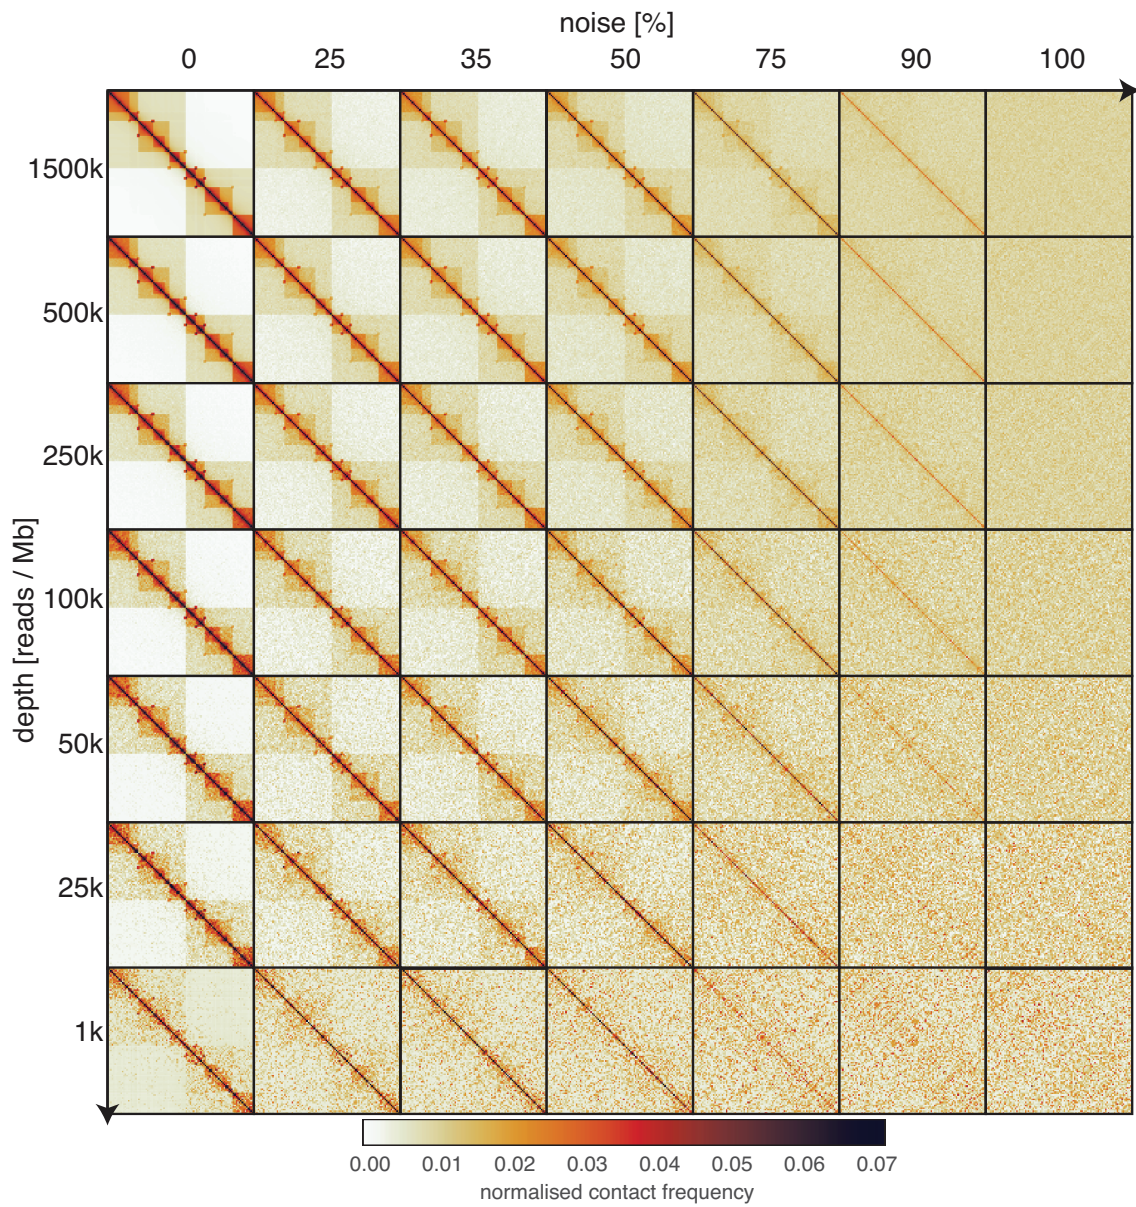

**Supplementary Figure 4. Examples of synthetic matrices with varying levels of noise and simulated number of read pairs (depth).** In all panels, depth was adjusted before adding noise.

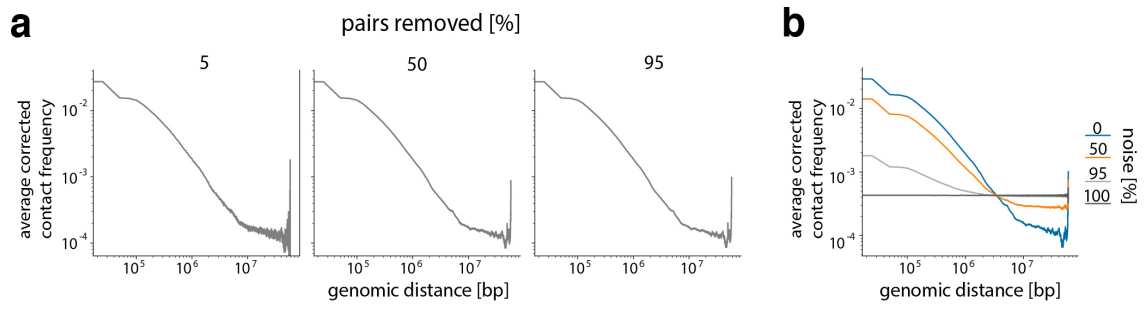

**Supplementary Figure 5. Effects of downsampling and noise on decay of average contact frequency with genomic distance. a**, after downsampling to lower sequencing depths, **b**, with increased percentage of random ligations (= noise). Decay functions were computed on data from Bonev et al. 2017<sup>12</sup>, on chromosome 19.
